# The fishing and natural mortality of large, piscivorous Bull Trout and Rainbow Trout in Kootenay Lake, British Columbia (2008-2013)

Joseph L. Thorley<sup>1</sup> and Greg Andrusak<sup>2</sup>

<sup>1</sup>Poisson Consulting Ltd., Nelson, British Columbia, Canada

<sup>2</sup>BC Fish and Wildlife Branch, Victoria, British Columbia, Canada

## ABSTRACT

**Background.** Estimates of fishing and natural mortality are important for understanding, and ultimately managing, commercial and recreational fisheries. High reward tags with fixed station acoustic telemetry provides a promising approach to monitoring mortality rates in large lake recreational fisheries. Kootenay Lake is a large lake which supports an important recreational fishery for large Bull Trout and Rainbow Trout.

**Methods.** Between 2008 and 2013, 88 large ( $\geq 500$  mm) Bull Trout and 149 large ( $\geq 500$  mm) Rainbow Trout were marked with an acoustic transmitter and/or high reward (\$100) anchor tags in Kootenay Lake. The subsequent detections and angler recaptures were analysed using a Bayesian individual state-space Cormack-Jolly-Seber (CJS) survival model with indicator variable selection.

**Results.** The final CJS survival model estimated that the annual interval probability of being recaptured by an angler was 0.17 (95% CRI 0.11 - 0.23) for Bull Trout and 0.14 (95% CRI 0.09 - 0.19) for Rainbow Trout. The annual interval survival probability for Bull Trout was estimated to have declined from 0.91 (95% CRI 0.77 - 0.97) in 2009 to just 0.45 (95% CRI 0.24 - 0.73) in 2013. Rainbow Trout survival was most strongly affected by spawning. The annual interval survival probability was 0.77 (95% CRI 0.68 - 0.85) for a non-spawning Rainbow Trout compared to 0.42 (95% CRI 0.31 - 0.54) for a spawner. The probability of spawning increased with the fork length for both species and decreased over the course of the study for Rainbow Trout.

**Discussion.** Fishing mortality was relatively low and constant while natural mortality was relatively high and variable. The results are consistent with Kokanee abundance as opposed to angler effort as the primary driver of short-term population fluctuations in Rainbow Trout abundance. Multi-species stock assessment models need to account for the fact that large Bull Trout are more abundant than large Rainbow Trout in Kootenay Lake.

**Keywords:** Survival, Exploitation, Cormack-Jolly-Seber, Bayesian, State-Space, Variable Selection, Acoustic Telemetry, Catchability.

## INTRODUCTION

Estimates of fishing (F) and natural mortality (M) are important for understanding, and ultimately managing, commercial and recreational fisheries (Hilborn, 1992; Walters and Martell, 2004). However separating the contributions of F and M to the total mortality (Z) of a fish population is challenging (Quinn and Deriso, 1999). In the case of large lake recreational fisheries, a promising approach (Bacheler et al., 2009) combines a high reward tagging program to provide information on F (Pollock et al., 2001) with an acoustic telemetry study to provide information on M (Pollock et al., 2004).

Kootenay Lake is a large (388 km<sup>2</sup>) waterbody in the upper Columbia River drainage that supports a 200,000 rod hour per year recreational fishery (Andrusak and Andrusak, 2012) primarily targeting large ( $\geq 500$  mm) Bull Trout (*Salvelinus confluentus*) and Rainbow Trout (*Onchorhynchus mykiss*). The Bull Trout are an adfluvial population that spawn in the many tributaries of Kootenay Lake (Andrusak and Andrusak, 2014). The large Rainbow Trout, which are often referred to as Gerrard Rainbow

Trout (Hartman and Galbraith, 1970), represent a genetically distinct (Keeley et al., 2007) piscivorous ecotype (Keeley et al., 2005). Both the Bull Trout and Rainbow Trout can reach trophy size ( $\geq 9$  kg).

Kootenay Lake has experienced several anthropogenic shifts in its nutrient loading over the past six decades (Northcote, 1973). In the 1950s and 1960s it was eutrophic due to nutrient pollution. Then in the 1970s pollution reduction and the retention of nutrients in recently constructed upstream reservoirs caused a long-term decline in lake productivity Daley et al. (1981). As a result Kokanee (*Oncorhynchus nerka*), which provide the primary food source for the piscivorous trout (Andrusak and Parkinson, 1984), also declined. In response, the North Arm of Kootenay Lake began to be fertilized in 1992 (Schindler et al., 2014). However, between 1997 and 2000 the fertilizer inputs were temporarily experimentally reduced before returning to pre-1997 levels in 2001. Most recently, in 2004, the fertilization program was expanded to also include the South Arm (Schindler et al., 2014).

Since the late 1980s, the large piscivorous Rainbow Trout in Kootenay Lake have exhibited population cycles of approximately seven to eight years in duration (Kurota et al., 2016). The immediate drivers of the short-term Rainbow Trout population cycles are thought to be Kokanee abundance and/or angler effort although the relative importance of each is unknown. If Kokanee abundance is the primary driver then  $M$  would be expected to be varying through time. Conversely, if angling effort is responsible then  $F$  should be variable. In contrast, relatively little is known about the status of the Bull Trout population; although preliminary analysis of redd counts suggest a decline in Bull Trout spawner abundance from 2009 to 2013 (Andrusak and Andrusak, 2014).

Here we document a combined tag-telemetry study to estimate the natural and fishing mortality of the large ( $\geq 500$  mm) Bull Trout and Rainbow Trout in Kootenay Lake. A secondary objective was to test whether  $F$  and/or  $M$  were changing through time. The study commenced in 2008 with a one year pilot program that was followed by three more years (2009-2011) of high reward tagging and acoustic telemetry and then a final two years (2012-2013) of high reward tagging only. The data were analysed using a Bayesian individual state-space formulation (Royle, 2008; Kéry and Schaub, 2011) of the Cormack-Jolly-Seber (CJS) (Cormack, 1964; Jolly, 1965; Seber, 1965) survival model to take into account acoustic detection probabilities, angler recaptures, spawning state and growth. Model selection was achieved by using indicator variable selection (Hooten and Hobbs, 2015). In 2011 a creel survey was conducted on Kootenay Lake (Andrusak and Andrusak, 2012). The recapture rates from the current study are combined with the effort and catch estimates from the creel survey to estimate the catchability and density for both populations.

## METHODS

### Study Area

The main body of Kootenay Lake (116.905°E 49.635°S) is a large (388 km<sup>2</sup>), long (109 km), narrow (4 km), deep (mean depth c. 100 m) section of water in the upper Columbia River drainage of southeastern British Columbia (Fig. 1). The Duncan-Lardeau River system feeds the North Arm while the Kootenay River feeds the South Arm (Fig. 1). The outlet of the main lake forms the upper end of the shallow West Arm which includes a series of narrow riverine sections. For more information on Kootenay Lake see Daley et al. (1981), Schindler et al. (2014) and Kurota et al. (2016).

### Acoustic Receivers

The study was made possible by the pre-existence of an acoustic receiver array. The array, which was supplemented so that it included a total of 25 VR2(W) 81 kHz Vemco® acoustic receivers in Kootenay Lake (Fig. 1), was originally designed to track juvenile White Sturgeon (*Acipenser transmontanus*) (Neufeld and Rust, 2009). The array has also been used to track fluvial Bull Trout (Paragamian and Walters, 2011) and juvenile Burbot (*Lota lota*) (Stephenson et al., 2013). An additional three VR2(W) 81 kHz Vemco® acoustic receivers were deployed each year in the Lardeau River at the outflow of Trout Lake (Fig. 1) in April and May to detect spawning Rainbow Trout (Irvine, 1978; Irvine et al., 2013).

The lake receivers were held in position by an anchor and a high pressure trawl float about 30 m below the surface. The receivers themselves were orientated in a downward direction at a depth of about 45 m. For more information on lake receiver deployment see Neufeld and Rust (2009). At the outflow of Trout Lake the three receivers were mounted to bankside submerged structures and orientated across the channel.

## Acoustic Transmitters

Between 2008 and 2011, Bull Trout and Rainbow Trout with a fork length  $\geq 500$  mm were tagged with a V13-1L or V13-1LP 81 kHz Vemco® acoustic transmitter. The V13-1L transmitters had a diameter of 13 mm, length of 36 mm and mass of 11 g while the V13P-1L transmitters had a diameter of 13 mm, length of 45 mm and mass of 12 g. In the pilot year (2008) the V13-1L transmitters had a nominal pulse frequency of 60 s (30-90 s) which resulted in a tag life of 455 days. In all subsequent years the nominal pulse rate was 120 s (60-180 s) which resulted in a tag life of 1,239 days for the V13-1L transmitters and 830 days for the V13P-1L transmitters. Anglers sometimes returned transmitters from fish they harvested. Recovered transmitters with a remaining tag life of 730 days or more were redeployed in new fish.

## Reward Tags

All fish were tagged with an orange \$100 reward anchor tag (Pollock et al., 2001). Following the pilot year, all but one Bull Trout and two Rainbow Trout were also tagged with a green \$10 reward anchor tag, a blue standard anchor tag or another \$100 reward anchor tag to provide information on tag loss (Fabrizio et al., 1999). The anchor tags were Floy® FD-68B T-bar anchor tags with 16 mm monofilament and 44 mm tubing. The anchor tags were attached below the dorsal fin on opposite sides using a Floy® Mark III regular pistol grip tagging gun.

To maximize anchor tag reporting (Pollock et al., 2001) the anchor tags displayed a government telephone number. The orange and green reward tags also displayed the text “REWARD \$100” or “REWARD \$10”, respectively. The reward tagging program was advertised on posters and in the local media (newspapers, radio and television). Rewards were only paid for returned anchor tags. Anglers were interviewed by phone to determine the date and location of recapture.

## Fish Capture and Handling

Fish were caught by trolling lures with barbless hooks behind a boat. Angled fish were quickly played to the side of the boat, netted, unhooked and placed into a 150 L cooler of aerated fresh water where they were allowed to recover for approximately 20 minutes. Only individuals with a fork length  $\geq 500$  mm that had not suffered hooking damage, were not heavily bleeding and were able to maintain equilibrium were acoustically and/or reward tagged.

Once recovered, angled fish were transferred to a second 150 L cooler of aerated fresh lake water and clove oil (emulsified in ethanol) at a concentration of 50 mg/L (Anderson et al., 1997; Prince and Powell, 2000). Fish were then held in the second cooler for approximately 150 seconds until they exhibited total loss of equilibrium and no longer responded to squeezing the caudal peduncle (Gutowsky et al., 2013, 2016).

The anaesthetised fish was then immediately placed upside down on a V-board where its gills were gently irrigated using a wash bottle filled with water from the second cooler. The acoustic tag and surgical equipment had been sterilised previously by soaking for approximately 20 minutes in 70% ethanol while the fish was recovering from capture. The acoustic tag and surgical equipment were rinsed with sterile saline solution prior to surgery to remove the ethanol. A scalpel blade (number 11) was used to make an incision of approximately 50 mm in length midway between the pelvic and pectoral fish, close to and parallel to the mid-ventral line. After insertion of the acoustic tag, an Ethicon® suture with 700 mm of 1.5 metric polydioxanone monofilament and a 19 mm 3/8 circle reverse cutting needle was used to close the incision with two or three interrupted stitches. Midway through stitching the irrigation wash bottle was replaced with one filled with fresh lake water.

Following surgical implantation of an acoustic transmitter, each fish was measured ( $\pm 1$  mm) and returned to the recovery cooler. While the fish was recovering it was anchor tagged and adipose clipped. All tagged fish were allowed to recover from surgery for approximately 20 minutes before being released within 500 m of the point of capture. In 2012 and 2013, fish were anchor tagged only and so were not anaesthetised or adipose clipped. Fish were obtained under scientific collection permits (CB08-43988, CB09-53420, CB10-61021, CB11-69505, CB12-76723) issued by the British Columbia Ministry of Forests Lands and Natural Resource Operations (MFLNRO).

## Data Manipulation

### Raw Data

The acoustic receiver VRL download files were processed using Vemco® VUE software to calculate the number of hourly detections of each transmitter by each acoustic receiver. The reported recaptures

were recorded by MFLNRO staff and the rewards administered by the Freshwater Fish Society of British Columbia (FFSBC). Based on lake geomorphology and the locations of the receivers (Fig. 1) the study area was divided into 30 sections (Fig. 2).

### Hourly Receiver Data

The hourly detection, receiver deployment, fish capture and recapture data sets and sectional shapefiles were manipulated using R version 3.3.1 (R Core Team, 2015). During data manipulation, two or less detections of a fish at a receiver in an hour or any detections after the expected tag life were discarded. The resultant clean and tidy (Wickham, 2014) data sets were bundled together in an R data package called *klexdatr* (Article S1).

### Daily Sectional Data

The hourly receiver detection data were then aggregated into daily sectional detection data using the *lexr* R package (Article S1). During the aggregation process, acoustically tagged individuals that 30 days after release were no longer detected or were only detected at a single section were classified as post-release mortalities and were excluded (Hightower et al., 2001). Detections of the same fish in more than section (7% of the total), were resolved in favour of the section with the most detections. Ties were broken by choosing the section with the least receivers and if still tied the smaller section (sectional areas were unique). The total percent receiver coverage of each section in each interval was calculated (Fig. 3) assuming a detectional radius of 500 m (Gutowsky et al., 2013, 2016; Huveneers et al., 2015).

### Seasonal Sectional Data

The *lexr* package was then used to group the daily data into seasonal periods for analysis. Following Gutowsky et al. (2013), the seasons were winter (January-March), spring (April-June), summer (July-September) and autumn (October-December). The final data included logical matrices indicating for each fish in each seasonal period whether it was monitored (active acoustic transmitter) and/or reported (recaptured) and whether it moved (detected in two or more sections) and/or spawned.

Spawning in Bull Trout was identified by a hiatus in detections for four or more weeks during August and September when the fish was deemed to have moved out of the main lake (O'Brien, 2001; Andrusak and Andrusak, 2014). For Rainbow Trout spawning was identified by either a detection in April or May at the outflow of Trout Lake (section S02) or a hiatus in detections for three or more weeks during April and May (Irvine, 1978; Irvine et al., 2013) with the bracketing detections occurring in the top 9% of Kootenay Lake (sections S07-S09).

## Statistical Analysis

### CJS Model

The probabilities of being recaptured (and reported) by an angler versus dying of other causes were estimated from the seasonal data using an individual state-space (Royle, 2008; Kéry and Schaub, 2011) Cormack-Jolly-Seber (CJS) (Cormack, 1964; Jolly, 1965; Seber, 1965) survival model. In the individual state-space formulation of the CJS model, the  $i$ th individual is alive when it is initially tagged at time period  $f_i$ , e.g.

$$z_{i,f_i} = 1. \quad (1)$$

Its latent state (alive versus dead) at subsequent periods is modelled as the outcome of a series of Bernoulli trials

$$z_{i,t+1} \sim \text{Bernoulli}(z_{i,t} \cdot \phi_{i,t}) \quad (2)$$

where  $\phi_{i,t}$  is the predicted survival for the  $i$ th fish in the  $t$ th time period. An individual that is alive at period  $t$  also has a probability  $\rho_{i,t}$  of being recaptured, i.e.,

$$y_{i,t} \sim \text{Bernoulli}(z_{i,t} \cdot \rho_{i,t}). \quad (3)$$

### Base Model

In the base model of the current study,  $\rho_{i,t}$  is the probability of being recaptured by an angler. To reduce the number of necessary assumptions, reported recaptures are excluded from the analysis for all subsequent time periods, i.e., subsequent detections or recaptures of any released individuals were ignored.

In addition, a living individual with an active transmitter ( $T_{i,t} = 1$ ) also has a probability ( $\delta_{i,t}$ ) of being detected moving ( $m_{i,t}$ ) between sections by the receiver array

$$m_{i,t} \sim \text{Bernoulli}(z_{i,t} \cdot T_{i,t} \cdot \delta_{i,t}). \quad (4)$$

Finally, in the spawning season ( $S_{i,t} = 1$ ) a fish has a probability  $\kappa_{i,t}$  of entering the state of spawning ( $x_{i,t} = 1$ ) for the period

$$x_{i,t} \sim \text{Bernoulli}(z_{i,t} \cdot S_{i,t} \cdot \kappa_{i,t}). \quad (5)$$

In the base model, the terms  $\phi_{i,t}$ ,  $\rho_{i,t}$ ,  $\delta_{i,t}$  and  $\kappa_{i,t}$ , which represent probabilities, are specified by four parameters, i.e.,

$$\text{logit}(\phi_{i,t}) = \beta_{\phi 0}, \quad (6)$$

$$\text{logit}(\rho_{i,t}) = \beta_{\rho 0}, \quad (7)$$

$$\text{logit}(\delta_{i,t}) = \beta_{\delta 0} \quad (8)$$

and

$$\text{logit}(\kappa_{i,t}) = \beta_{\kappa 0} \quad (9)$$

where

$$\text{logit}(p) = \log\left(\frac{p}{1-p}\right). \quad (10)$$

#### 183 **Full Model**

The full model extends the base model through the inclusion of seven additional parameters ( $\beta_{\kappa L}$ ,  $\beta_{\phi x}$ ,  $\beta_{\delta S}$ ,  $\beta_{\kappa Y}$ ,  $\beta_{\rho Y}$ ,  $\beta_{\phi Y}$  and  $\beta_{\delta Y}$ ). The first parameter ( $\beta_{\kappa L}$ ) allows the log odds probability of spawning to vary with the calculated fork length ( $L_{i,t}$ )

$$\text{logit}(\kappa_{i,t}) = \beta_{\kappa 0} + \beta_{\kappa L} \cdot L_{i,t} \quad (11)$$

while the second ( $\beta_{\phi x}$ ) allows the log odds survival to vary with spawning

$$\text{logit}(\phi_{i,t}) = \beta_{\phi 0} + \beta_{\phi x} \cdot x_{i,t}. \quad (12)$$

The fork lengths were calculated based on the measured length at capture  $L_{i,f_i}$  plus the length increment expected under a Von Bertalanffy Growth Curve (Walters and Martell, 2004)

$$L_{i,t} = L_{i,f_i} + (L_{\infty} - L_{i,f_i})(1 - e^{-0.25 \cdot k(t-f_i)}) \quad (13)$$

184 where the 0.25 in the exponent adjusts for the fact that there are four time periods (seasons) per year. The  
185 calculation assumes a  $L_{\infty}$  of 1,000 mm with a  $k$  of 0.13 for Bull Trout and a  $k$  of 0.19 (Andrusak and  
186 Thorley, 2014) for Rainbow Trout.

The third additional parameter ( $\beta_{\delta S}$ ) allows the log odds probability of being detected moving to vary with the spawning season

$$\text{logit}(\delta_{i,t}) = \beta_{\delta 0} + \beta_{\delta S} \cdot S_{i,t} \quad (14)$$

while the last four parameters ( $\beta_{\kappa Y}$ ,  $\beta_{\rho Y}$ ,  $\beta_{\phi Y}$  and  $\beta_{\delta Y}$ ) allow the probability of spawning, recapture, survival, and detection moving between sections to vary with the standardised year ( $Y_{i,t}$ ), i.e.,

$$\text{logit}(\kappa_{i,t}) = \beta_{\kappa 0} + \beta_{\kappa Y} \cdot Y_{i,t}. \quad (15)$$



**Parameter Estimation.** The parameters were estimated using Bayesian methods (Ntzoufras, 2009; Kéry, 2010; Kéry and Schaub, 2011). The prior distribution for each parameter was a normal distribution with a mean of 0 and a standard deviation of 3, i.e.,

$$\beta_{\kappa 0} \sim \text{Normal}(0, 3). \quad (16)$$

The posterior distributions of the parameters were estimated using a Monte Carlo Markov Chain (MCMC) algorithm. To avoid non-convergence of the MCMC process, five chains were run, starting at randomly selected initial values. Each chain was run for at least  $10^5$  iterations with the first half of the chain discarded for burn-in followed by further thinning to leave a grand total of 10,000 samples. Convergence was confirmed by ensuring that  $\hat{R} \leq 1.05$  for each of the parameters in the model (Brooks and Gelman, 1998; Kéry and Schaub, 2011).

The vagueness of the priors was assessed by a sensitivity analysis (Kéry and Schaub, 2011). More specifically, the model was refitted with the prior distribution for each parameter a normal distribution with a mean of 0 and a standard deviation of 6. The sensitivity of the posteriors to the change in priors was assessed using  $\hat{R}$ . Although developed to quantify the convergence between chains,  $\hat{R}$  can also be used as a metric of the convergence between models by combining all the samples for each model. The vagueness of the priors was confirmed by ensuring that the between model  $\hat{R}$  values were all  $\leq 1.2$ . A higher minimum  $\hat{R}$  value was accepted for the between model (than the within model convergence) because the purpose of the test was to confirm that the posteriors were not unduly altered by the change in the priors, i.e., except in the case of simple models with lots of data it is not realistic to expect that a substantial change in the priors will have no effect at all on any of the posteriors. The chosen  $\hat{R}$  value of 1.2 is within the accepted range of values used to confirm the convergence of chains within a single model (Kéry and Schaub, 2011).

The reported point estimates are the mean and the 95% credible intervals (CRIs) are the 2.5 and 97.5% quantiles (Gelman, 2014). Unless stated otherwise all presented and plotted estimates are for a 650 mm non-spawner in the autumn of 2011.

### Model Selection

Model selection was achieved by using indicator variable selection (Hooten and Hobbs, 2015) to estimate probabilities for the inclusion of the seven additional parameters from the full model in a final model. More specifically, "stochastic search variable selection" (George and McCulloch, 1993; Hooten and Hobbs, 2015) was used to assign an indicator variable to each parameter such that

$$\gamma_{\kappa L} \sim \text{Bernoulli}(1/2) \quad (17)$$

$$\beta_{\kappa L} \sim \gamma_{\kappa L} \cdot \text{Normal}(0, 3) + (1 - \gamma_{\kappa L}) \text{Normal}(0, 0.03) \quad (18)$$

In other words if the indicator is 1 then the parameter is drawn from the standard vague prior, otherwise the parameter is drawn from a prior that is so constrained that its value is effectively zero. The values of  $\gamma_{pY}$  and  $\gamma_{\phi Y}$  indicate the support for a change in F and M, respectively, over the course of the study.

**Software.** The analyses were performed using R version 3.3.1 (R Core Team, 2015), JAGS 4.2.0 (Plummer, 2015) and the klexr R package (Article S1), which was developed specifically for this paper.

### Model Assumptions

The validity of a statistical model's estimates depends on the extent to which its assumptions are violated (Kéry and Schaub, 2011). Like the standard CJS model, the modified form used in the current analysis assumes that

1. The tagged individuals are a random sample from the population.
2. There are no effects of tagging.
3. There is no loss of anchor or acoustic tags.
4. All individuals are correctly identified.
5. There is no emigration out of the main lake.

- 223 6. There are no unmodelled individual differences in the probability of recapture in each time interval.
- 224 7. There are no unmodelled individual differences in the probability of survival in each time interval.
- 225 8. The fate of each individual is independent of the fate of any other individual.
- 226 9. The sampling periods are instantaneous and all individuals are immediately released.
- 227 In addition, the modified form used in the current study also assumes that
- 228 10. There are no unmodelled individual differences in the probability of a living individual with an
- 229 active acoustic transmitter being detected moving among sections in each time period.
- 230 11. Anglers report all anchor tags.
- 231 12. Spawning events are correctly identified.
- 232 13. Growth increments are correctly calculated.

233 The extent to which each assumption may have been violated was assessed based on the literature and,  
234 when available, auxiliary data. In particular, the random nature of the population sample was assessed by  
235 plotting the spatial distribution of captures, daily detections and recaptures. The extent of any outmigration  
236 was evaluated from the proportion of acoustically tagged individuals last detected at the top of the North  
237 Arm (S07), bottom of the South Arm (S32) and at the upper end of the West Arm (S20). Only individuals  
238 that were last detected at least 120 days before the end of their transmitter life and were not subsequently  
239 recaptured were considered to be possible outmigrants. Finally, anchor tag loss was estimated from the  
240 proportion of double-tagged individuals that had lost a anchor tag at recapture using a simple Bayesian  
241 zero-truncated binomial tag-loss model (Fabrizio et al., 1999).

## 242 RESULTS

### 243 Fish Captures and Recaptures

#### 244 *Captures*

245 Between 2008 and 2013, 88 large ( $\geq 500$  mm) Bull Trout and 149 large ( $\geq 500$  mm) Rainbow Trout were  
246 marked with at least one \$100 reward anchor tag (Tables 1-2). A total of 69 of the Bull Trout and 114 of  
247 the Rainbow Trout were also acoustically tagged. Most Bull Trout were caught in the central portion of  
248 the main lake or the top of the North Arm (Fig. S1) while most Rainbow Trout were caught in the central  
249 portion of the main lake (Fig. S2).

#### 250 *Post-release Mortalities*

251 Of the acoustically tagged individuals five (7%) of the Bull Trout and 28 (25%) of the Rainbow Trout were  
252 no longer detected moving between sections 30 days after release. They were deemed to be post-release  
253 mortalities and were excluded from the data. The daily detections are plotted by section and date in  
254 Figure 4 for the remaining 83 Bull Trout and 121 Rainbow Trout.

#### 255 *Detections*

256 The spatial distribution of the daily detections indicates that fish use of the main lake was relatively evenly  
257 distributed for both Bull Trout (Fig. S3) and Rainbow Trout (Fig. S4). A grand total of 27 acoustically  
258 tagged Bull Trout, which were not subsequently recaptured, were last detected moving in the main lake  
259 120 days before the end of their transmitter life (Table 6). Of the 27 Bull Trout, seven (26%) were last  
260 detected moving at section S07, one (4%) at S20 and zero (0%) at S32. For Rainbow Trout, the grand  
261 total was 48 individuals (Table 7), of which seven (15%) were last detected at section S07, four (8%) at  
262 S20 and three (6%) at S32.

#### 263 *Recaptures*

264 A total of 26 of the 83 Bull Trout and 24 of the 121 Rainbow Trout were reported to have been recaptured  
265 by an angler (Fig. 4). In the main lake, most of the Bull Trout were recaptured in the central portion or  
266 the top of the North Arm (Fig. S5). In contrast the Rainbow Trout recaptures were relatively evenly  
267 distributed throughout the main lake with the exception of the most northerly sections of the North Arm  
268 and the most southerly sections of the South Arm (Fig. S6).

Of the 25 Bull Trout recaptures that had been initially tagged with a \$100 and a \$10 tag, 18 had both anchor tags, three had just the \$100 tag and four had just the \$10 tag. For the 22 equivalent Rainbow Trout recaptures, 20 had both anchor tags, zero had just the \$100 tag and two had just the \$10 tag. Analysis of the number of individuals with one versus two anchor tags using the simple Bayesian tag-loss model estimates the probability of a single-tagged individual losing its anchor tag between release and recapture to be 0.18 (95% CRI 0.08 - 0.33) for Bull Trout and 0.07 (95% CRI 0.01 - 0.17) for Rainbow Trout. The corresponding probability of a double-tagged individual losing both its anchor tags (assuming the fates of both tags are independent) is 0.04 (95% CRI 0.01 - 0.11) and 0.007 (95% CRI 0.000 - 0.029), for Bull Trout and Rainbow Trout, respectively.

## Parameter Estimates and Model Selection

### Parameter Estimation

Model convergence was confirmed by an  $\hat{R} \leq 1.03$  for Bull Trout and  $\leq 1.03$  for Rainbow Trout. The vagueness of the priors was confirmed by a between model  $\hat{R} \leq 1.06$  for Bull Trout and  $\leq 1.16$  for Rainbow Trout.

### Recapture

The final CJS survival model estimated that the annual probability of being recaptured (and reported) by an angler ( $\rho$ ) was 0.17 (95% CRI 0.11 - 0.23) for Bull Trout and 0.14 (95% CRI 0.09 - 0.19) for Rainbow Trout. The indicator variable probabilities for  $\gamma_{\rho Y}$  were 0.09 and 0.09 for each species, respectively, revealing little to no support for a change in the probability of recapture with year.

### Survival

The survival probability for Bull Trout was largely unaffected by spawning ( $\gamma_{\phi K} = 0.29$ ) but changed over the course of the study ( $\gamma_{\phi Y} = 0.97$ ). More specifically, the annual Bull Trout survival probability was estimated to have declined from 0.91 (95% CRI 0.77 - 0.97) in 2009 to just 0.45 (95% CRI 0.24 - 0.73) in 2013 (Figure 5).

In contrast, Rainbow trout survival was strongly affected by spawning ( $\gamma_{\phi K} = 1.00$ ) and may have changed over the course of the study ( $\gamma_{\phi Y} = 0.80$ ). If present, the change in survival over time was a decline (Figure 5). The CJS model estimated that spawning reduced the annual Rainbow Trout survival probability from 0.77 (95% CRI 0.68 - 0.85) to 0.42 (95% CRI 0.31 - 0.54) (Figure 6).

### Spawning

For both species, the probability of spawning was clearly dependent on the fork length as  $\gamma_{KL} = 0.01$  for Bull Trout and 0.03 for Rainbow Trout. Figure 7 indicates that the probability of spawning increases from 0.39 (95% CRI 0.15 - 0.66) for a 500 mm Bull Trout to 0.94 (95% CRI 0.84 - 0.99) for a 800 mm Bull Trout. The equivalent values for Rainbow Trout are 0.00 (95% CRI 0.00 - 0.00) and 0.90 (95% CRI 0.75 - 0.98), respectively.

There was little support ( $\gamma_{KY} = 0.24$ ) for a change in the probability of spawning for Bull Trout from 2009 to 2013. However, in contrast, there was strong support ( $\gamma_{KY} = 1.00$ ) for a decline in the probability of spawning for Rainbow Trout over the course of the study (Fig. 8).

### Movement

The last key parameter in the CJS model - the probability of being detected moving among sections while alive with an active transmitter - varied by spawning season for Bull Trout ( $\gamma_{\delta S} = 1.00$ ) but not Rainbow Trout ( $\gamma_{\delta S} = 0.19$ ). In the case of Bull Trout, the probability was 0.49 (95% CRI 0.40 - 0.58) for being detected moving during the summer spawning season compared to 0.91 (95% CRI 0.88 - 0.94) during the other seasons. The probability of being detected moving was 0.95 (95% CRI 0.93 - 0.97) for Rainbow Trout. Over the course of the study, the probability of being detected moving among sections may have ( $\gamma_{\delta Y} = 0.63$ ) declined ( $\beta_{\delta Y} = -0.37$ ) for Bull Trout but not Rainbow Trout ( $\gamma_{\delta Y} = 0.09$ ).

### Fishing and Natural Mortality

If all recaptures are harvested then  $F = -\log(1 - \rho)$  and the estimated annual instantaneous fishing mortality ( $F$ ) is 0.18 (95% CRI 0.12 - 0.26) for Bull Trout and 0.15 (95% CRI 0.09 - 0.22) for Rainbow Trout. Similarly, as  $M = -\log(\phi)$  the estimated annual instantaneous natural mortality ( $M$ ) for a Bull Trout was 0.09 (95% CRI 0.26 - 0.03) in 2009 and 0.80 (95% CRI 1.44 - 0.31) in 2013. For Rainbow Trout  $M$  was 0.86 (95% CRI 1.18 - 0.62) for a spawner and 0.26 (95% CRI 0.39 - 0.16) for a non-spawner. The natural mortality is plotted by fork length in Figure 9.



## 321 **Catchability**

The creel survey estimated that in 2011, a grand total of 189,457 angler hours (and 201,434 rod hours) were expended fishing Kootenay Lake (Andrusak and Andrusak, 2012), which corresponds to an angler effort (E) of 4.88 angler-hr.ha<sup>-1</sup>.yr<sup>-1</sup>. If the catchability coefficient (*q*) is defined to be the probability of (re)capture (*ρ*) per unit of effort (Ward et al., 2013), i.e.,

$$q = \frac{\rho}{E} \quad (19)$$

322 then *q* = 0.034 (95% CRI 0.023 - 0.048) angler-hr<sup>-1</sup>.ha<sup>-1</sup>.yr<sup>-1</sup> for Bull Trout and 0.028 (95% CRI 0.018  
323 - 0.040) angler-hr<sup>-1</sup>.ha<sup>-1</sup>.yr<sup>-1</sup> for Rainbow Trout.

## 324 **Density**

325 The creel survey estimated that 4,845 large (≥ 500 mm) Bull Trout and 3,320 large Rainbow Trout were  
326 caught by anglers (Andrusak and Andrusak, 2012). Given the estimated recapture rates, the catches  
327 suggest that the density of large Bull Trout in Kootenay Lake in 2011 was 0.75 fish.ha<sup>-1</sup> and the density  
328 of large Rainbow Trout was 0.63 fish.ha<sup>-1</sup>.

## 329 **DISCUSSION**

### 330 **Model Reliability**

331 The reliability of any model's estimates depends on the extent to which its assumptions are met. If none  
332 of the CJS model's assumptions are violated then, the results indicate that the potential fishing mortality,  
333 if anglers harvest all fish, was *F* = 0.18 for Bull Trout and *F* = 0.15 for Rainbow Trout; that the natural  
334 mortality increased from *M* = 0.09 to *M* = 0.80 over the course of the study for Bull Trout; and that for  
335 Rainbow Trout, spawning increased *M* from 0.26 to 0.86. The following paragraphs discuss each of the  
336 assumptions of the CJS model together with the implications of any violations for the mortality estimates.

337 **Sample** The model assumes that the tagged individuals are a random sample from the population. The  
338 distribution of captures suggested some spatial clustering. However, the detections of acoustically tagged  
339 fish indicated a high degree of mixing, suggesting that spatially at least the tagged fish were representative.  
340 The possibility that fish may have differed in their susceptibility to (re)capture by angling is discussed  
341 below.

342 **Tagging** The second assumption is that there are no effects of tagging. To reduce the chances of  
343 post-release mortality inflating *M*, fish that were no longer detected moving between sections 30 days  
344 after release were excluded from the analysis (Hightower et al., 2001). The fact that 7% of the Bull Trout  
345 versus 25% of Rainbow were judged to be post-release mortalities suggests that in the short-term at least  
346 Bull Trout are less affected by capture, handling and surgery. To ensure any longer-term effects of tagging  
347 were minimal, the transmitter to body weight ratio was ≤ 0.9% (Brown et al., 1999).

348 **Anchor Tag and Transmitter Loss** The CJS model assumed that there was no anchor tag or transmitter  
349 loss (Brenden et al., 2010). To minimize anchor tag loss, all fish were double-tagged. Analysis of double  
350 versus single-tagged recaptures indicates that the probability of losing both anchor tags was 4% for Bull  
351 Trout and 0.7% for Rainbow Trout. The higher loss rate for Bull Trout may be due to the spawning  
352 migration they undertake up steep turbulent tributaries (Andrusak and Andrusak, 2014). The exclusion of  
353 fish that had ceased moving within 30 days of initial capture reduced the chances that transmitter loss  
354 would affect the mortality estimates (Hightower et al., 2001).

355 **Identification** Anglers were required to return all tags. Consequently it is unlikely that fish were  
356 misidentified.

357 **Emigration** The model assumed that there was no movement outside of the main lake other than  
358 temporary seasonal spawning migrations by Bull Trout in the summer and Rainbow Trout in the spring.  
359 Bull Trout spawn in tributaries to Kootenay Lake (Andrusak and Andrusak, 2014) as well as tributaries to  
360 Trout Lake and Duncan Reservoir (O'Brien, 2001). The seven Bull Trout that were last detected at the top  
361 of the North Arm (sections S07 and S09) in the spring (Table 6) may have been early-leaving spawners  
362 headed to Trout Lake or Duncan Reservoir (O'Brien, 2001) that failed to return. The implications of the  
363 misidentification of spawning events is discussed below. The 18 Rainbow Trout that were last detected

in the spring at the top of the North Arm or at section S02 at the outflow of Trout Lake (Table 7) are accounted for as spawning mortalities by the model. With the exception of the seven spring Bull Trout migrants at the top of the North Arm there is no indication of any significant movement outside the main lake other than temporary seasonal spawning migrations that are accounted for by the model.

**Recapture** A key assumption of all mark-recapture studies is that there are no unmodelled individual differences in the probability of (re)capture in each time interval (Biro, 2013). As is often the case, the reliance on a single capture method means it is not possible to test this assumption (Biro, 2013). Depending on whether any individual differences were fixed or learned the estimated potential fishing mortality would be an over or under-estimate, respectively (Askey et al., 2006; Biro, 2013).

**Survival** The full model allowed survival to vary with spawning status and year. Simulations by Matechou et al. (2013) indicate that the survival estimates are likely to be robust to any remaining time-dependent variation.

**Independence** Individuals exhibited no obvious shoaling or coordination of movements other than spawning migrations. Consequently the fate of each individual was likely independent of the fate of any other individual.

**Instantaneous** While individual were almost immediately released, the sampling periods for captures, recaptures and detections were effectively continuous. However, because the seasonal survival was high ( $\geq 82\%$  for Bull Trout and  $\geq 81\%$  for Rainbow Trout) and because the purpose was to estimate overall annual survival across four seasonal time periods, substantial biases are not expected (Barbour et al., 2013).

**Movement** The CJS model assumes that mortalities exhibit no movement. Consequently if the model was to overestimate the probability of a living individual with an active transmitter being detected moving between sections then M would also be overestimated. However, this is unlikely for three reasons. Firstly, the model allowed the probability of movement to vary with spawning season and year. Secondly, the seasonal probability of detecting an individual moving between sections was relatively high (91% for Bull Trout and 95% for Rainbow Trout). Finally, the state-space component of the model means that a temporarily inactive individual or one that is subsequently recaptured will not be misidentified as a natural mortality. Consequently any bias in M is expected to be small.

**Reporting** To maximize the tag reporting rate, which was assumed to be 100%, at least one of the tags was worth \$100 tag (Bacheler et al., 2009). Previous studies on Common Snook (*Centropomus undecimalis*) in Florida in the late 1990s (Taylor et al., 2006) and multiple freshwater fish species in Idaho from 2006 to 2009 (Meyer et al., 2012) suggest that \$100 is sufficient to achieve reporting rates of approximately 99%.

**Spawning** The model assumed that spawning events are correctly identified. Large Rainbow Trout from Kootenay Lake almost exclusively spawn at the head of the Lardeau River (Irvine, 1978; Irvine et al., 2013). As the gravels were acoustically monitored during the spring it is likely that most of the Rainbow Trout spawning events were correctly identified.

For Bull Trout the situation is more complicated. Large Bull Trout from Kootenay Lake spawn in multiple tributaries of Kootenay Lake, Trout Lake and Duncan Reservoir (O'Brien, 2001; Andrusak and Andrusak, 2014). Consequently it was not possible to monitor spawning locations and spawning was inferred by a hiatus in detections for four or more weeks during August and September. As a result only fish which successfully returned to Kootenay Lake in the fall post-spawning were identified as spawners. Bull Trout that succumbed to spawning-related injuries, stress or predation prior to returning to Kootenay Lake were identified as inlake natural mortalities. As a result M is likely biased high for non-spawning Bull Trout and biased low for spawners. This bias may explain why an effect of spawning on mortality was not detected for Bull Trout.

**Growth** The model assumed that growth was described by a seasonal Von Bertalanffy Growth Curve with a  $L_{\infty}$  of 1,000 mm and a  $k$  of 0.13 for Bull Trout and a  $k$  of 0.19 for Rainbow Trout. The curve for Bull Trout was partly based on large Bull Trout in Adams Lake, British Columbia (Bison et al., 2003). The growth curve for Rainbow Trout was based on lake specific data (Andrusak and Thorley, 2014) and is likely a good approximation.

## Mortality Estimates

The implications of any violations of the assumptions are negligible for the mortality estimates with two exceptions. The reliance on a single capture method means that  $F$  could be an over or under-estimate for either or both species. Similarly, the difficulty identifying Bull Trout spawners means that spawning Bull Trout may experience a higher  $M$  than non-spawners.

## Fishing Mortality

The actual fishing mortalities are dependent on the release and handling mortality rates. Taken at face value the estimates from the CJS model indicate that if anglers were to harvest all fish, then the annual instantaneous fishing mortality would be approximately  $F = 0.18$  for Bull Trout and  $F = 0.15$  for Rainbow Trout. The corresponding annual interval fishing mortalities are 17% and 14%, respectively. The creel survey calculated that in 2011 anglers released 40% of the Bull Trout and 62% of the Rainbow Trout they captured (Andrusak and Andrusak, 2012). Consequently, if large fish are released at the same rate as small fish and there are no post-release mortalities, then the effective annual interval fishing mortalities would be approximately 10% for Bull Trout and 5% for Rainbow Trout.

## Post-Release Mortality

The current study indicates that the large Bull Trout in Kootenay Lake are relatively robust to angling and surgical implantation of an acoustic transmitter with a 30 day post-release mortality of 7%. For comparison, Post et al. (2003) in their age-structured model of an adfluvial bull trout population presumed post-release mortality was 10% but considered values of 2% and 25%. The current study estimated that large Rainbow Trout experience a post-release mortality of 25%. For comparison, meta-analyses indicate that the mean post-release mortality in salmonid recreational fisheries is 16-18% although the distribution is positively skewed with most estimates  $\leq 11\%$  (Bartholomew and Bohnsack, 2005; Huhn, Daniel and Arlinghaus, Robert, 2011). It is worth noting that the current estimates include surgical implantation of an acoustic transmitter and may therefore be inflated relative to the post-release mortality of fish caught-and-released by recreational anglers. It is however also possible that the care taken playing, landing and recovering the fish resulted in a comparable or even lower post-release mortality rate than in the recreational fishery.

## Catchability

Remarkably few estimates of catchability have been published for large piscivorous trout. A notable exception is Post et al. (2003) who based on creel data from Lower Kananaskis Lake and experimental fishery data from Marie Lake and Quirk Creek considered a  $q$  of 0.07 fish caught.vulnerable fish<sup>-1</sup>.angler-hr<sup>-1</sup>.ha<sup>-1</sup>.yr<sup>-1</sup> to be representative for Bull Trout. They assumed fish were invulnerable to capture at  $\leq 200$  mm and completely vulnerable by 400 mm. Their nominal value of 0.07 is more than double the current Bull Trout estimate of 0.034 angler-hr<sup>-1</sup>.ha<sup>-1</sup>.yr<sup>-1</sup>. However, Post et al. (2003) did consider the possibility that  $q$  ranged between 0.035 and 0.14. The reasons for the relatively low catchability of Bull Trout in Kootenay Lake are unknown but could include less efficient angling methods (anglers primarily target Rainbow Trout) or more uniform fish distributions.

Catchability is typically strongly negatively related to the population density - a phenomenon known as hyperstability (Ward et al., 2013). Based on a meta-analysis of Lake Trout (*Salvelinus namaycush*) in 12 lakes in Ontario, Canada, Shuter et al. (1998) modelled the relationship between catchability and density ( $D$ ) using a modified form of the equation

$$q = \exp\left(-\frac{0.14 \cdot E}{1 + 0.35 \cdot D}\right) \cdot E^{-1}. \quad (20)$$

In Kootenay Lake, Bull Trout occurred at a density of 0.75 fish.ha<sup>-1</sup> and experienced an effort of 4.88 angler-hr.ha<sup>-1</sup>.yr<sup>-1</sup>. If large Bull Trout have the same catchability as Lake Trout, Equation 20 predicts a catchability of 0.12 angler-hr<sup>-1</sup>.ha<sup>-1</sup>.yr<sup>-1</sup>. Although less than the upper range of 0.14 considered by Post et al. (2003), 0.12 is still much higher than the estimated value of 0.034 angler-hr<sup>-1</sup>.ha<sup>-1</sup>.yr<sup>-1</sup>.

Ward et al. (2013) concluded that hyperstability for stocked Rainbow Trout in 18 British Columbian lake was caused by differences in angler skill with less experienced anglers tending to target lakes with higher fish densities. The lakes were all small waterbodies (< 45 ha) with high fish densities (> 15 fish.ha<sup>-1</sup>) and no natural recruitment. As the predictions were for small insectivorous trout at high densities they could not be reliably extrapolated to large piscivorous Rainbow Trout. Nonetheless, Ward

et al.'s (2013) findings suggest that Catch-Per-Unit-Effort may need to be scaled by angler effort when attempting to model Bull Trout and Rainbow Trout abundance in Kootenay Lake.

### Inter-annual Variability

There was little to no support for a change in the fishing mortality for either Bull Trout or Rainbow Trout over the course of the study. This finding is important because, as discussed below, it suggests that angler effort is not the primary driver of any short-term fluctuations.

### Natural Mortality

Post et al. (2003) assumed a constant annual instantaneous natural mortality of 0.20 for their Bull Trout population model. The estimate was based on the observed mortality of mature Bull Trout in Lower Kananaskis Lake and Shuter et al.'s (1998) estimates for Lake Trout. Shuter et al. (1998) tabulated estimates of  $M$  from 12 lakes. The largest value was 0.4 while the remaining 11 were between 0.12 and 0.25. For comparison, the CJS model estimated that the annual instantaneous natural mortality of Bull Trout increased from 0.09 in 2009 to 0.80 in 2013; although it is worth noting that the upper estimate in 2009 was 0.26 and the lower estimate in 2013 was 0.31.

The current study estimated that the annual instantaneous natural mortality of a non-spawning large Rainbow Trout was 0.26 compared to 0.86 for a spawner. The ecological, evolutionary and management implications of the mortality cost of spawning are discussed below. As the probability of spawning increased with body length the annual instantaneous natural mortality rate was also size-dependent.

To the best of our knowledge a direct estimate (Hoenig et al., 2016) of the natural mortality of large Rainbow Trout has not been published in the peer-reviewed literature. There are however numerous empirical (indirect) equations for calculating  $M$  based on other life-history parameters (Then et al., 2015; Hamel, 2015). Based on over 200 fish species, (Then et al., 2015) recommended the maximum age ( $t_{max}$ ) based estimator

$$M = 4.899 \cdot t_{max}^{-0.916} \quad (21)$$

when possible and the growth-based method

$$M = 4.188 \cdot k^{0.73} \cdot L_{\infty}^{-0.33} \quad (22)$$

otherwise. When applied to large Rainbow Trout in Kootenay Lake with  $t_{max} = 8$  (Andrusak and Andrusak, 2015),  $k = 0.19$  (Andrusak and Thorley, 2014) and  $L_{\infty} = 1000$ , the estimated values of  $M$  are 0.73 using Equation 21 and 0.13 using Equation 22. The discrepancy in the empirical estimates as well as their inability to account for annual and length-based variation in  $M$  indicates the limitations of an indirect approach to estimating the natural mortality of large piscivorous trout.

### Inter-annual Variability

The CJS model strongly supported an increase in the natural mortality of Bull Trout over the course of the study. Further support for an increase in Bull Trout natural mortality is also provided by a preliminary redd count analysis for Kootenay Lake (Andrusak and Andrusak, 2014) that suggests a lake-wide decrease in the number of spawners from a peak in 2009 to a low in 2013 (the last year of the redd count study). As the CJS model provided little support for a change in the probability of Bull Trout spawning the decline in the number of Bull Trout spawners likely reflects a decline in Bull Trout abundance. The finding that  $M$  has changed over the course of the study is important because it is consistent with Kokanee abundance as a driver of short-term Bull Trout population dynamics.

The CJS model only provided moderate support for an increase in the natural mortality of Rainbow Trout. More specifically the CJS model estimated that the annual instantaneous natural mortality of a non-spawning Rainbow Trout increased from 0.12 in 2008 to 0.48 in 2013. In contrast, Rainbow Trout escapement increased from 1,583 in 2008 to a high of 3,289 in 2012 before falling slightly in the spring of the final year of the current study (Fig. 10). Remarkably, while the escapement was increasing to record levels the probability of spawning was declining dramatically. This finding is important because it suggests that the actual increase in the number of large Rainbow Trout was even more dramatic than indicated by the escapement. The management implications of this result are discussed below.

## Spawning

For Bull Trout the CJS model did not identify an increase in the mortality rate associated with spawning. However, as discussed above spawners which died prior to returning to Kootenay Lake would have been misidentified as inlake mortalities. It is therefore likely that the natural mortality of spawners and non-spawners are under and over-estimated, respectively.

For Rainbow Trout, spawning increased the annual interval natural mortality rate from 23% to 58%. The increase is consistent with the limited spawning area and high levels of antagonistic interactions at the outflow of Trout Lake (Hartman, 1969; Hartman and Galbraith, 1970). The increase is also consistent with the finding that the probability of spawning is low for Kootenay Lake Rainbow Trout smaller than approximately 650 mm in length, i.e., the high spawner mortality rate may select for delayed maturation to maximize life-time egg deposition.

## Population Fluctuations

There was no evidence for a change in the fishing mortality over the course of the study but strong and moderate evidence for a decline in the natural mortality of Bull Trout and Rainbow Trout, respectively. These results are consistent with Kokanee as opposed to anglers as a driver of the short-term population fluctuations. Further evidence for the role of Kokanee is provided by Kokanee escapement at Meadow Creek spawning channel and the Lardeau River (MFLNRO, 2016). Kokanee escapement peaked in 2011 before entering a sustained and severe decline (Fig. 11). By 2014, Kokanee escapement was at a historical low and the body condition of Rainbow Trout in Kootenay Lake was over 20% lower than in 2011 suggesting serious food limitation (Andrusak and Andrusak, 2015).

An additional key finding is that the probability of spawning declined dramatically for Rainbow Trout over the course of the study. Given the high mortality cost of spawning also identified by the current study, it is natural that reduced Kokanee abundance might cause fish to delay spawning. However, an important implication of the variation in the probability of spawning is that the Rainbow Trout escapement at the outflow to Trout Lake may be a less reliable index of population abundance than previously assumed.

Finally it is important to note that the results of the current study do not preclude changes in angler effort or lake productivity as drivers of longer-term trends in abundance. Indeed in a recent modelling effort Kurota et al. (2016) concluded that the peak in Rainbow Trout in 2012 was caused by a longer-term increase in recruitment combined with a longer-term reduction in F.

## Management Implications

The findings of the current study have two main implications for the management of the Kootenay Lake lake trout recreational fishery. Firstly, the low and constant fishing mortality versus the relatively high and variable natural mortality suggests that Kokanee abundance not angling pressure has been the major driver of recent short-term cycles in Rainbow Trout population abundance. Secondly, the fact that large Bull Trout are at least as abundant as the large Rainbow Trout means that multi-species population models such as that developed by Kurota et al. (2016) need to take the Bull Trout into account.

## ACKNOWLEDGMENTS

Kerry Reed of Reel Adventures and Alan Richardson of Magic Charters provided guide services. Kerry Reed tagged the fish in 2012 and 2013. Jeff Burrows (MFLNRO), Matt Neufeld (MFLNRO), Robyn Irvine (Poisson Consulting), Harvey Andrusak (Redfish Consulting) and others provided additional boat assistance. Matt Neufeld and Sarah Stephenson (MFLNRO) downloaded and maintained the acoustic receiver array. Gary Pavan processed the detection and capture data and created the lake sections. Bernhard Konrad provided code to check the consistency of detections. Harvey Andrusak, Steve Arndt and Crystal Klym (FWCP) provided comments on earlier drafts.

## REFERENCES

- Anderson, W. G., McKinley, R. S., and Colavecchia, M. (1997). The Use of Clove Oil as an Anesthetic for Rainbow Trout and Its Effects on Swimming Performance. *North American Journal of Fisheries Management*, 17(2):301–307.
- Andrusak, G. and Andrusak, H. (2014). Bull Trout redd count surveys in select Kootenay Lake tributaries (2013) and recommendations for future surveys. A Redfish Consulting Ltd. Report, Fish and Wildlife Compensation Program, Castlegar, B.C.



- 552 Andrusak, G. and Thorley, J. (2014). Kootenay Lake Exploitation Study: A combined tag-telemetry  
553 approach to estimate fishing and natural mortality of large Bull Trout and Rainbow Trout on Kootenay  
554 Lake, British Columbia - 2014 Annual Report. A Poisson Consulting Ltd. and Redfish Consulting Ltd.  
555 Report 10.13140/RG.2.1.3116.2644, Habitat Conservation Trust Foundation, Victoria, BC.
- 556 Andrusak, G. F. and Andrusak, H. (2015). Gerrard Rainbow Trout Growth and Condition with Kokanee  
557 Prey at Low Densities. A Redfish Consulting Ltd. Report F-F15-15, Fish and Wildlife Compensation  
558 Program – Columbia, Nelson, BC.
- 559 Andrusak, H. and Andrusak, G. F. (2012). Kootenay Lake Angler Creel Survey 2011. A Redfish  
560 Consulting Ltd. Report, Fish and Wildlife Compensation Program – Columbia Basin, Nelson, BC.
- 561 Andrusak, H. and Parkinson, E. (1984). Food Habitats of Gerrard Stock Rainbow Trout in Kootenay Lake,  
562 British Columbia. Technical Report 60, Fish and Wildlife Branch.
- 563 Askey, P. J., Richards, S. A., Post, J. R., and Parkinson, E. A. (2006). Linking angling catch rates and  
564 fish learning under catch-and-release regulations. *North American Journal of Fisheries Management*,  
565 26(4):1020–1029.
- 566 Bacheler, N. M., Buckel, J. A., Hightower, J. E., Paramore, L. M., and Pollock, K. H. (2009). A combined  
567 telemetry – tag return approach to estimate fishing and natural mortality rates of an estuarine fish.  
568 *Canadian Journal of Fisheries and Aquatic Sciences*, 66(8):1230–1244.
- 569 Barbour, A. B., Ponciano, J. M., and Lorenzen, K. (2013). Apparent survival estimation from continuous  
570 mark-recapture/resighting data. *Methods in Ecology and Evolution*, 4(9):846–853.
- 571 Bartholomew, A. and Bohnsack, J. A. (2005). A Review of Catch-and-Release Angling Mortality with  
572 Implications for No-take Reserves. *Reviews in Fish Biology and Fisheries*, 15(1-2):129–154.
- 573 Biro, P. A. (2013). Are most samples of animals systematically biased? Consistent individual trait  
574 differences bias samples despite random sampling. *Oecologia*, 171(2):339–345.
- 575 Bison, R., O'Brien, D., and Martell, S. J. (2003). An Analysis of Sustainable Fishing Options for Adams  
576 Lake Bull Trout Using Life History and Telemetry Data. Technical report, BC Ministry of Water Land  
577 and Air Protection, Kamloops, B.C.
- 578 Brenden, T. O., Jones, M. L., and Ebener, M. P. (2010). Sensitivity of tag-recovery mortality estimates to  
579 inaccuracies in tag shedding, handling mortality, and tag reporting. *Journal of Great Lakes Research*,  
580 36:100–109.
- 581 Brooks, S. and Gelman, A. (1998). General methods for monitoring convergence of iterative simulations.  
582 *Journal of Computational and Graphical Statistics*, 7(4):434–455.
- 583 Brown, R. S., Cooke, S. J., Anderson, W. G., and McKinley, R. S. (1999). Evidence to Challenge the “2%  
584 Rule” for Biotelemetry. *North American Journal of Fisheries Management*, 19(3):867–871.
- 585 Cormack, R. M. (1964). Estimates of Survival from the Sighting of Marked Animals. *Biometrika*,  
586 51(3/4):429.
- 587 Daley, R., Carmack, E., and Gray, C. (1981). Effects of upstream impoundments on the limnology of  
588 Kootenay Lake, BC.
- 589 Fabrizio, M. C., Nichols, J. D., Hines, J. E., Swanson, B. L., and Schram, S. T. (1999). Modeling data from  
590 double-tagging experiments to estimate heterogeneous rates of tag shedding in lake trout (*Salvelinus*  
591 *namaycush*). *Canadian Journal of Fisheries and Aquatic Sciences*, 56(8):1409–1419.
- 592 Gelman, A. (2014). *Bayesian data analysis*. Chapman & Hall/CRC texts in statistical science. CRC Press,  
593 Boca Raton, third edition edition.
- 594 George, E. I. and McCulloch, R. E. (1993). Variable Selection via Gibbs Sampling. *Journal of the*  
595 *American Statistical Association*, 88(423):881–889.
- 596 Gutowsky, L., Harrison, P., Martins, E., Leake, A., Patterson, D., Power, M., and Cooke, S. (2013). Diel  
597 vertical migration hypotheses explain size-dependent behaviour in a freshwater piscivore. *Animal*  
598 *Behaviour*, 86(2):365–373.
- 599 Gutowsky, L., Harrison, P., Martins, E., Leake, A., Patterson, D., Power, M., and Cooke, S. (2016).  
600 Interactive effects of sex and body size on the movement ecology of adfluvial bull trout ( *Salvelinus*  
601 *confluentus* ). *Canadian Journal of Zoology*, 94(1):31–40.
- 602 Hamel, O. S. (2015). A method for calculating a meta-analytical prior for the natural mortality rate using  
603 multiple life history correlates. *ICES Journal of Marine Science*, 72(1):62–69.
- 604 Hartman, G. (1969). Reproductive Biology of the Gerrard Stock Rainbow Trout. In Northcote, T.,  
605 editor, *Symposium on salmon and trout in streams*, pages 53–67, Vancouver, B.C. University of British  
606 Columbia.

- 607 Hartman, G. and Galbraith, D. (1970). The Reproductive Environment of the Gerrard Stock Rainbow  
608 Trout. Fisheries Management Publication 15, Fish and Wildlife Branch, Victoria, BC.
- 609 Hightower, J. E., Jackson, J. R., and Pollock, K. H. (2001). Use of Telemetry Methods to Estimate Natural  
610 and Fishing Mortality of Striped Bass in Lake Gaston, North Carolina. *Transactions of the American*  
611 *Fisheries Society*, 130(4):557–567.
- 612 Hilborn, R. (1992). *Quantitative fisheries stock assessment: choice, dynamics, and uncertainty*. Chapman  
613 and Hall, New York.
- 614 Hoenig, J. M., Then, A. Y.-H., Babcock, E. A., Hall, N. G., Hewitt, D. A., and Hesp, S. A. (2016). The  
615 logic of comparative life history studies for estimating key parameters, with a focus on natural mortality  
616 rate. *ICES Journal of Marine Science: Journal du Conseil*, page fsw089.
- 617 Hooten, M. B. and Hobbs, N. T. (2015). A guide to Bayesian model selection for ecologists. *Ecological*  
618 *Monographs*, 85(1):3–28.
- 619 Huhn, Daniel and Arlinghaus, Robert (2011). Determinants of hooking mortality in freshwater recreational  
620 fisheries: a quantitative meta-analysis. In *The angler in the environment: social, economic, biological,*  
621 *and ethical dimensions: proceedings of the 5th World Recreational Fishing Conference*, number 75 in  
622 American Fisheries Society symposium. Amer Fisheries Society, Bethesda, Md. OCLC: ocn741563434.
- 623 Huveneers, C., Simpfendorfer, C. A., Kim, S., Semmens, J., Hobday, A. J., Pederson, H., Stieglitz, T.,  
624 Vallee, R., Webber, D., Heupel, M. R., Peddemors, V., and Harcourt, R. (2015). The influence of  
625 environmental parameters on the performance and detection range of acoustic receivers. *Methods in*  
626 *Ecology and Evolution*, pages n/a–n/a.
- 627 Irvine, J. (1978). The Gerrard Rainbow Trout of Kootenay Lake, British Columbia - A discussion of their  
628 life history with management, research and enhancement recommendations. Fisheries Management  
629 Report 72, Fish and Wildlife Branch, Victoria, BC.
- 630 Irvine, R., Baxter, J., and Thorley, J. (2013). Lower Duncan River Gerrard Rainbow Trout Monitoring  
631 2013. A Mountain Water Research and Poisson Consulting Ltd. Report, BC Hydro, Castlegar, B.C.
- 632 Jolly, G. M. (1965). Explicit estimates from capture-recapture data with both death and immigration-  
633 stochastic model. *Biometrika*, 52(1/2):225–247.
- 634 Keeley, E. R., Parkinson, E. A., and Taylor, E. B. (2005). Ecotypic differentiation of native rainbow  
635 trout (*Oncorhynchus mykiss*) populations from British Columbia. *Canadian Journal of Fisheries and*  
636 *Aquatic Sciences*, 62(7):1523–1539.
- 637 Keeley, E. R., Parkinson, E. A., and Taylor, E. B. (2007). The origins of ecotypic variation of rainbow  
638 trout: a test of environmental vs. genetically based differences in morphology. *Journal of Evolutionary*  
639 *Biology*, 20(2):725–736.
- 640 Kurota, H., McAllister, M. K., Parkinson, E., and Johnston, T. (2016). Evaluating the influence of  
641 predator-prey interactions on stock assessment and management reference points for a large lake  
642 ecosystem. *Canadian Journal of Fisheries and Aquatic Sciences*.
- 643 Kéry, M. (2010). *Introduction to WinBUGS for Ecologists: A Bayesian approach to regression, ANOVA,*  
644 *mixed models and related analyses*. Elsevier, Amsterdam; Boston.
- 645 Kéry, M. and Schaub, M. (2011). *Bayesian population analysis using WinBUGS : a hierarchical*  
646 *perspective*. Academic Press, Boston.
- 647 Matechou, E., Pledger, S., Efford, M., Morgan, B. J., and Thomson, D. L. (2013). Estimating age-specific  
648 survival when age is unknown: open population capture-recapture models with age structure and  
649 heterogeneity. *Methods in Ecology and Evolution*, 4(7):654–664.
- 650 Meyer, K. A., Elle, F. S., Lamansky, J. A., Mamer, E. R. J. M., and Butts, A. E. (2012). A Reward-  
651 Recovery Study to Estimate Tagged-Fish Reporting Rates by Idaho Anglers. *North American Journal*  
652 *of Fisheries Management*, 32(4):696–703.
- 653 MFLNRO (2016). Kootenay Lake Action Plan 2016. A Redfish Consulting Ltd. Report, Ministry of  
654 Forests, Lands and Natural Resource Operations, Nelson, BC.
- 655 Neufeld, M. D. and Rust, P. J. (2009). Using passive sonic telemetry methods to evaluate dispersal and  
656 subsequent movements of hatchery-reared white sturgeon in the Kootenay River. *Journal of Applied*  
657 *Ichthyology*, 25:27–33.
- 658 Northcote, T. (1973). Some impacts of man on Kootenay Lake and its salmonids. Technical Report  
659 Technical Report No, 25, Fish and Wildlife Branch, Victoria, BC.
- 660 Ntzoufras, I. (2009). *Bayesian Modeling Using WinBUGS*. John Wiley & Sons Inc., Hoboken, New  
661 Jersey.

- 662 O'Brien, D. (2001). *Bull Trout (Salvelinus confluentus) Spawning Migrations in the Duncan River: Insights from Telemetry and DNA*. M.Sc., University of British Columbia, Vancouver, BC.
- 663
- 664 Paragamian, V. L. and Walters, J. P. (2011). Bull trout (*Salvelinus confluentus*) movement in a transbound-  
665 ary river. *Journal of Freshwater Ecology*, 26(1):65–76.
- 666 Plummer, M. (2015). JAGS version 4.0.1 user manual.
- 667 Pollock, K. H., Hoenig, J. M., Hearn, W. S., and Calingaert, B. (2001). Tag Reporting Rate Estimation: 1.  
668 An Evaluation of the High-Reward Tagging Method. *North American Journal of Fisheries Management*,  
669 21(3):521–532.
- 670 Pollock, K. H., Jiang, H., and Hightower, J. E. (2004). Combining telemetry and fisheries tagging  
671 models to estimate fishing and natural mortality rates. *Transactions of the American Fisheries Society*,  
672 133(3):639–648.
- 673 Post, J. R., Mushens, C., Paul, A., and Sullivan, M. (2003). Assessment of alternative harvest regulations  
674 for sustaining recreational fisheries: model development and application to bull trout. *North American*  
675 *Journal of Fisheries Management*, 23(1):22–34.
- 676 Prince, A. and Powell, C. (2000). Clove Oil as an Anesthetic for Invasive Field Procedures on Adult  
677 Rainbow Trout. *North American Journal of Fisheries Management*, 20(4):1029–1032.
- 678 Quinn, T. J. and Deriso, R. B. (1999). *Quantitative fish dynamics*. Oxford University Press, New York.  
679 OCLC: 434872106.
- 680 R Core Team (2015). R: A Language and Environment for Statistical Computing.
- 681 Royle, J. A. (2008). Modeling Individual Effects in the Cormack-Jolly-Seber Model: A State-Space  
682 Formulation. *Biometrics*, 64(2):364–370.
- 683 Schindler, E., Johner, D., Weir, T., Sebastien, D., Bassett, M., Vidmanic, L., and Ashley, K. (2014).  
684 Kootenay Lake Nutrient Restoration Program Years 20 and 21 (North Arm) and Years 8 and 9 (South  
685 arm) (2011 and 2012) Report. Technical report, Ministry of Forests, Lands and Natural Resource  
686 Operations, Nelson, B.C.
- 687 Seber, G. A. F. (1965). A Note on the Multiple-Recapture Census. *Biometrika*, 52(1/2):249.
- 688 Shuter, B. J., Jones, M. L., Korver, R. M., and Lester, N. P. (1998). A general, life history based model for  
689 regional management of fish stocks: the inland lake trout (*Salvelinus namaycush*) fisheries of Ontario.  
690 *Canadian journal of fisheries and aquatic sciences*, 55(9):2161–2177.
- 691 Stephenson, S. M., Neufeld, M. D., Ireland, S. C., Young, S., Hardy, R. S., and Rust, P. (2013). Survival and  
692 Dispersal of Sonic-Tagged, Hatchery-Reared Burbot Released into the Kootenay River. *Transactions*  
693 *of the American Fisheries Society*, 142(6):1671–1679.
- 694 Taylor, R. G., Whittington, J. A., Pine, W. E., and Pollock, K. H. (2006). Effect of Different Reward  
695 Levels on Tag Reporting Rates and Behavior of Common Snook Anglers in Southeast Florida. *North*  
696 *American Journal of Fisheries Management*, 26(3):645–651.
- 697 Then, A. Y., Hoenig, J. M., Hall, N. G., and Hewitt, D. A. (2015). Evaluating the predictive performance  
698 of empirical estimators of natural mortality rate using information on over 200 fish species. *ICES*  
699 *Journal of Marine Science*, 72(1):82–92.
- 700 Walters, C. J. and Martell, S. J. D. (2004). *Fisheries Ecology and Management*. Princeton University  
701 Press, Princeton, N.J.
- 702 Ward, H. G., Askey, P. J., Post, J. R., and Rose, K. (2013). A mechanistic understanding of hyperstability  
703 in catch per unit effort and density-dependent catchability in a multistock recreational fishery. *Canadian*  
704 *Journal of Fisheries and Aquatic Sciences*, 70(10):1542–1550.
- 705 Wickham, H. (2014). Tidy Data. *Journal of Statistical Software*, 59(10):1–22.

## 706 FIGURES

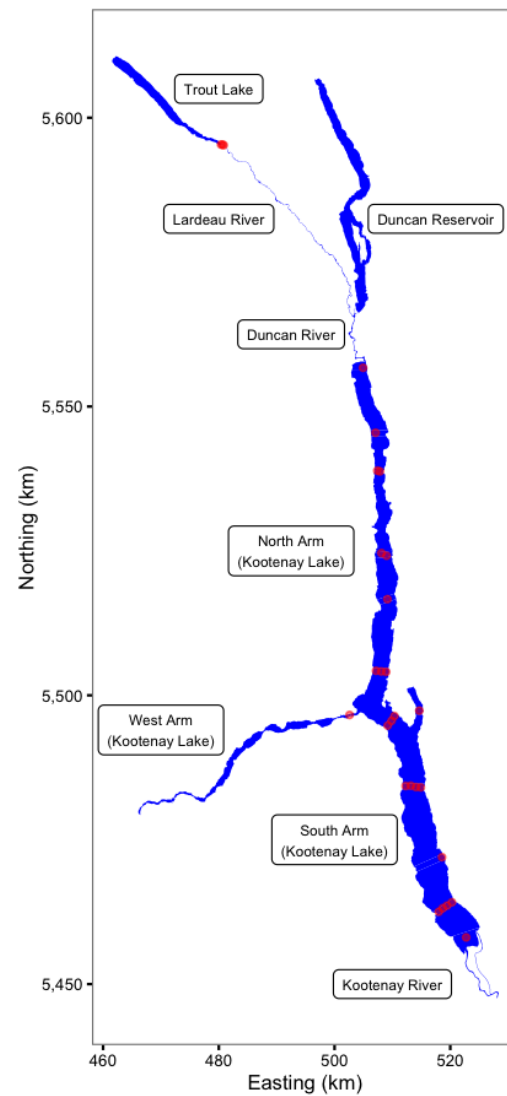

**Figure 1.** The study area including Kootenay Lake. The locations of the acoustic receivers are indicated by red circles. Spatial information licensed under the Open Government License of British Columbia.

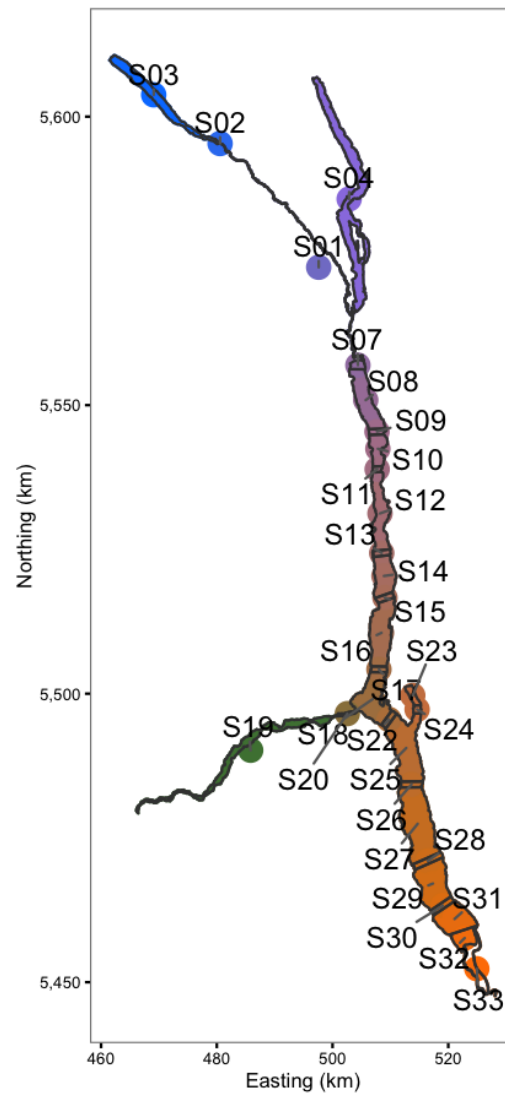

**Figure 2.** The study area including Kootenay Lake by color-coded section. The same color-coding scheme is used in the following two figures. Spatial information licensed under the Open Government License of British Columbia.



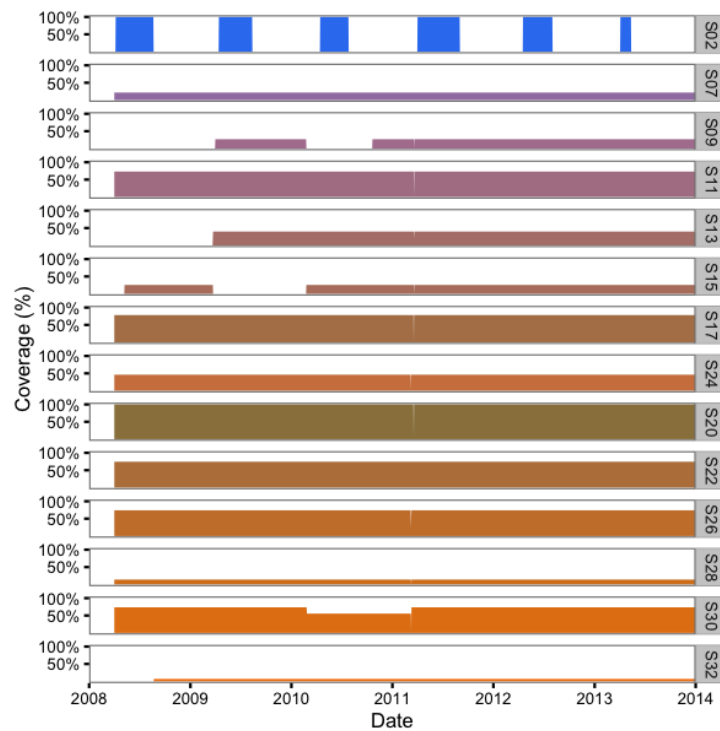

**Figure 3.** Daily acoustic receiver coverage in the study area by color-coded section.

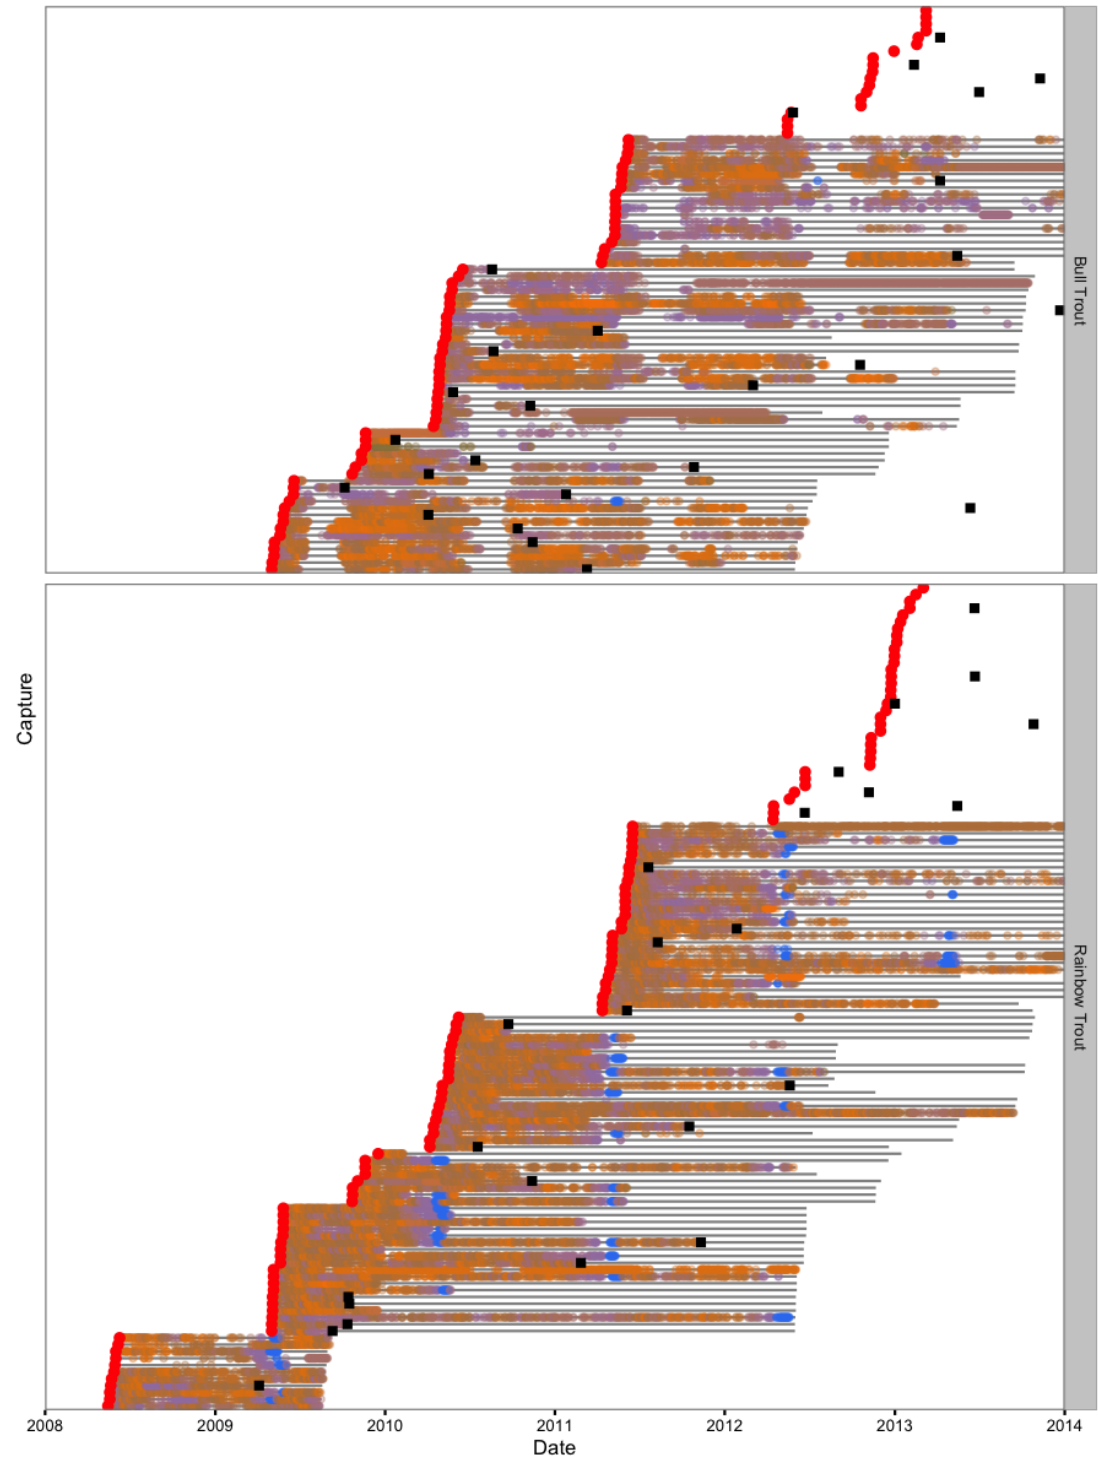

**Figure 4.** Daily acoustic detections in the study area by fish, species and color-coded section. Captures are indicated by the red circles, recaptures by the black squares and transmitter life by the horizontal grey lines.

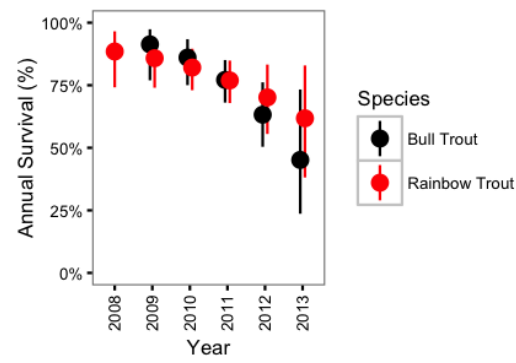

**Figure 5.** Estimated annual survival probabilities for non-spawning Bull Trout and Rainbow Trout by year. The dotted lines represent 95% CRIs.

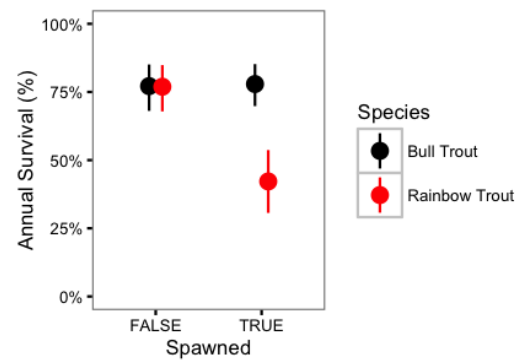

**Figure 6.** Estimated annual survival probabilities for Bull Trout and Rainbow Trout in 2011 by spawning status. The bars represent 95% CRIs.

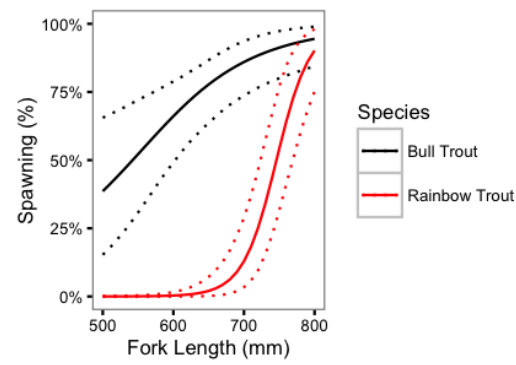

**Figure 7.** Estimated probabilities of spawning for Bull Trout and Rainbow Trout by fork length. The dotted lines represent 95% CRIs.



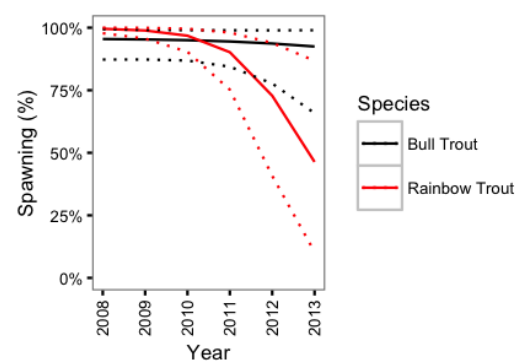

**Figure 8.** Estimated probability of spawning for a 800 mm Bull Trout and Rainbow Trout by year. The dotted lines represent 95% CRIs.

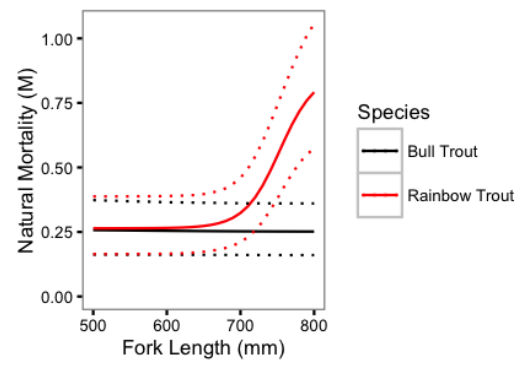

**Figure 9.** Estimated annual instantaneous natural mortality for Bull Trout and Rainbow Trout in 2011 by fork length. The dotted lines represent 95% CRIs.

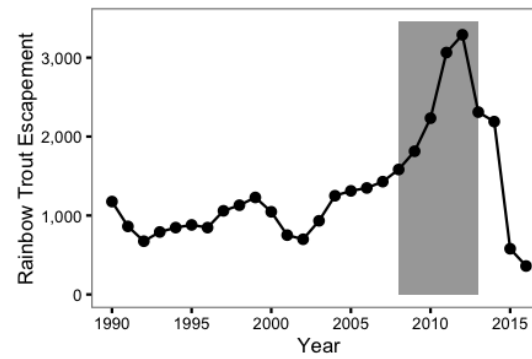

**Figure 10.** Rainbow Trout spawner abundance at the outflow of Trout Lake by year. The grey rectangle indicates the period of the study from 2008 to 2013.

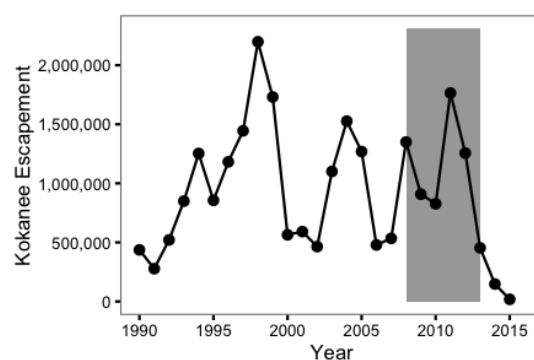

**Figure 11.** Kokanee spawner abundance at Meadow Creek and the Lardeau River by year. The grey rectangle indicates the period of the study from 2008 to 2013.

## 707 TABLES

| Year | \$100 | \$10 | \$0 | No |
|------|-------|------|-----|----|
| 2008 | 0     | 0    | 0   | 0  |
| 2009 | 0     | 21   | 1   | 0  |
| 2010 | 0     | 26   | 0   | 0  |
| 2011 | 0     | 21   | 0   | 0  |
| 2012 | 0     | 12   | 0   | 1  |
| 2013 | 0     | 6    | 0   | 0  |

**Table 1.** The number of captured Bull Trout by year and the value of the second anchor tag. All in cases the first anchor tag was a \$100 reward tag. With the exception of 2012 and 2013, the fish were also acoustically tagged.

| Year | \$100 | \$10 | \$0 | No |
|------|-------|------|-----|----|
| 2008 | 1     | 0    | 0   | 17 |
| 2009 | 0     | 30   | 1   | 0  |
| 2010 | 0     | 29   | 0   | 0  |
| 2011 | 1     | 34   | 0   | 1  |
| 2012 | 0     | 26   | 0   | 0  |
| 2013 | 0     | 8    | 0   | 1  |

**Table 2.** The number of captured Rainbow Trout by year and the value of the second anchor tag. All in cases the first anchor tag was a \$100 reward tag. With the exception of 2012 and 2013, the fish were also acoustically tagged.



| Parameter              | Description                                                                |
|------------------------|----------------------------------------------------------------------------|
| $Y$                    | The standardised year.                                                     |
| $FL$                   | The calculated fork length.                                                |
| $L$                    | $(FL - 600) / 100$                                                         |
| $\beta_{\delta 0}$     | The log odds seasonal probability of being detected moving among sections. |
| $\beta_{\delta S}$     | The effect of spawning season on $\beta_{\delta 0}$ .                      |
| $\beta_{\delta Y}$     | The effect of $Y$ on $\beta_{\delta 0}$ .                                  |
| $\beta_{\kappa 0}$     | The log odds probability of spawning.                                      |
| $\beta_{\kappa L}$     | The effect of $L$ on $\beta_{\kappa 0}$ .                                  |
| $\beta_{\kappa Y}$     | The effect of $Y$ on $\beta_{\kappa 0}$ .                                  |
| $\beta_{\phi 0}$       | The log odds seasonal probability of surviving.                            |
| $\beta_{\phi \kappa}$  | The effect of spawning on $\beta_{\phi 0}$ .                               |
| $\beta_{\phi Y}$       | The effect of $Y$ on $\beta_{\phi 0}$ .                                    |
| $\beta_{\rho 0}$       | The log odds seasonal probability of being recaptured.                     |
| $\beta_{\rho Y}$       | The effect of $Y$ on $\beta_{\rho 0}$ .                                    |
| $\gamma_{\delta S}$    | The selection probability for $\beta_{\delta S}$ .                         |
| $\gamma_{\delta Y}$    | The selection probability for $\beta_{\delta Y}$ .                         |
| $\gamma_{\kappa L}$    | The selection probability for $\beta_{\kappa L}$ .                         |
| $\gamma_{\kappa Y}$    | The selection probability for $\beta_{\kappa Y}$ .                         |
| $\gamma_{\phi \kappa}$ | The selection probability for $\beta_{\phi \kappa}$ .                      |
| $\gamma_{\phi Y}$      | The selection probability for $\beta_{\phi Y}$ .                           |
| $\gamma_{\rho Y}$      | The selection probability for $\beta_{\rho Y}$ .                           |

**Table 3.** Descriptions for each of the parameters in the final CJS model.

| Parameter              | Estimate | Lower     | Upper    | SD       | Error | Significance |
|------------------------|----------|-----------|----------|----------|-------|--------------|
| $\beta_{\delta 0}$     | 2.364    | 1.984     | 2.773    | 0.200    | 17    | 0.0001       |
| $\beta_{\delta S}$     | -2.404   | -2.958    | -1.867   | 0.280    | 23    | 0.0001       |
| $\beta_{\delta Y}$     | -0.3656  | -0.9741   | 0.0380   | 0.3268   | 140   | 0.2828       |
| $\beta_{\kappa 0}$     | 2.469    | 1.389     | 3.597    | 0.558    | 45    | 0.0001       |
| $\beta_{\kappa L}$     | 0.01189  | 0.00458   | 0.01970  | 0.00387  | 64    | 0.0004       |
| $\beta_{\kappa Y}$     | -0.1384  | -1.2466   | 0.0970   | 0.3567   | 480   | 0.7994       |
| $\beta_{\phi \kappa}$  | 0.3835   | -0.2893   | 3.6866   | 1.0751   | 520   | 0.8066       |
| $\beta_{\phi 0}$       | 2.720    | 2.293     | 3.189    | 0.229    | 16    | 0.0001       |
| $\beta_{\phi Y}$       | -0.9932  | -1.6333   | -0.0257  | 0.3589   | 81    | 0.0298       |
| $\beta_{\rho 0}$       | -3.063   | -3.484    | -2.684   | 0.203    | 13    | 0.0001       |
| $\beta_{\rho Y}$       | 0.009750 | -0.081110 | 0.258680 | 0.092140 | 1700  | 0.9446       |
| $\gamma_{\delta S}$    | 1.000    | 1.000     | 1.000    | 0.000    | 0     | 0.0001       |
| $\gamma_{\delta Y}$    | 0.6337   | 0.0000    | 1.0000   | 0.4818   | 79    | 0.0001       |
| $\gamma_{\kappa L}$    | 0.01020  | 0.00000   | 0.00000  | 0.10050  | 0     | 0.0001       |
| $\gamma_{\kappa Y}$    | 0.2409   | 0.0000    | 1.0000   | 0.4277   | 210   | 0.0001       |
| $\gamma_{\phi \kappa}$ | 0.2913   | 0.0000    | 1.0000   | 0.4544   | 170   | 0.0001       |
| $\gamma_{\phi Y}$      | 0.9673   | 0.0000    | 1.0000   | 0.1779   | 52    | 0.0001       |
| $\gamma_{\rho Y}$      | 0.08950  | 0.00000   | 1.00000  | 0.28550  | 560   | 0.0001       |

**Table 4.** Key fixed parameter estimates for the final Bull Trout CJS survival model. The columns are the *parameter* name, the point *estimate*, the *lower* and *upper* 95 % credible intervals, the standard deviation (*SD*), the percent relative *error*, and the statistical *significance*.

| Parameter              | Estimate  | Lower     | Upper    | SD       | Error | Significance |
|------------------------|-----------|-----------|----------|----------|-------|--------------|
| $\beta_{\delta 0}$     | 2.966     | 2.534     | 3.494    | 0.242    | 16    | 0.0001       |
| $\beta_{\delta S}$     | -0.08090  | -0.90053  | 0.09156  | 0.25475  | 610   | 0.8294       |
| $\beta_{\delta Y}$     | -0.001120 | -0.178210 | 0.157830 | 0.096100 | 15000 | 0.9934       |
| $\beta_{\kappa 0}$     | 0.1780    | -0.7742   | 1.2075   | 0.5001   | 560   | 0.7292       |
| $\beta_{\kappa L}$     | 0.04453   | 0.02921   | 0.06352  | 0.00882  | 39    | 0.0001       |
| $\beta_{\kappa Y}$     | -2.143    | -3.515    | -0.967   | 0.651    | 59    | 0.0018       |
| $\beta_{\phi \kappa}$  | -2.652    | -3.376    | -1.962   | 0.365    | 27    | 0.0001       |
| $\beta_{\phi 0}$       | 2.709     | 2.285     | 3.172    | 0.226    | 16    | 0.0001       |
| $\beta_{\phi Y}$       | -0.5027   | -1.0542   | 0.0242   | 0.3191   | 110   | 0.1428       |
| $\beta_{\rho 0}$       | -3.296    | -3.732    | -2.896   | 0.212    | 13    | 0.0001       |
| $\beta_{\rho Y}$       | 0.01617   | -0.06655  | 0.31078  | 0.09182  | 1200  | 0.9118       |
| $\gamma_{\delta S}$    | 0.1872    | 0.0000    | 1.0000   | 0.3901   | 270   | 0.0001       |
| $\gamma_{\delta Y}$    | 0.09080   | 0.00000   | 1.00000  | 0.28730  | 550   | 0.0001       |
| $\gamma_{\kappa L}$    | 0.03400   | 0.00000   | 1.00000  | 0.18120  | 1500  | 0.0001       |
| $\gamma_{\kappa Y}$    | 0.9980    | 1.0000    | 1.0000   | 0.0447   | 0     | 0.0001       |
| $\gamma_{\phi \kappa}$ | 1.000     | 1.000     | 1.000    | 0.000    | 0     | 0.0001       |
| $\gamma_{\phi Y}$      | 0.8002    | 0.0000    | 1.0000   | 0.3999   | 62    | 0.0001       |
| $\gamma_{\rho Y}$      | 0.09090   | 0.00000   | 1.00000  | 0.28750  | 550   | 0.0001       |

**Table 5.** The coefficient table for Rainbow Trout. The columns are the *parameter* name, the point *estimate*, the *lower* and *upper* 95 % credible intervals, the standard deviation (*SD*), the percent relative *error*, and the statistical *significance*.

| Section | Winter | Spring | Summer | Autumn |
|---------|--------|--------|--------|--------|
| S07     | 0      | 6      | 1      | 0      |
| S09     | 0      | 1      | 0      | 2      |
| S11     | 0      | 1      | 1      | 1      |
| S13     | 0      | 2      | 1      | 0      |
| S15     | 1      | 0      | 0      | 0      |
| S17     | 0      | 2      | 0      | 1      |
| S24     | 1      | 0      | 0      | 1      |
| S20     | 0      | 0      | 0      | 1      |
| S22     | 1      | 0      | 0      | 0      |
| S26     | 0      | 1      | 0      | 0      |
| S30     | 0      | 1      | 0      | 1      |

**Table 6.** The number of Bull Trout last detected at each section by season. Only individuals that were last detected at least 120 days before the end of their transmitter life and were not subsequently recaptured are included.

| Section | Winter | Spring | Summer | Autumn |
|---------|--------|--------|--------|--------|
| S02     | 0      | 11     | 0      | 0      |
| S07     | 0      | 7      | 0      | 0      |
| S09     | 1      | 0      | 0      | 0      |
| S11     | 0      | 3      | 1      | 1      |
| S17     | 0      | 0      | 1      | 1      |
| S24     | 0      | 0      | 1      | 1      |
| S20     | 1      | 2      | 1      | 0      |
| S22     | 1      | 2      | 0      | 1      |
| S26     | 2      | 2      | 0      | 0      |
| S28     | 0      | 0      | 1      | 0      |
| S30     | 2      | 0      | 1      | 1      |
| S32     | 0      | 3      | 0      | 0      |

**Table 7.** The number of Rainbow Trout last detected at each section by season. Only individuals that were last detected at least 120 days before the end of their transmitter life and were not subsequently recaptured are included.

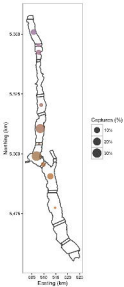



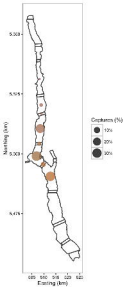

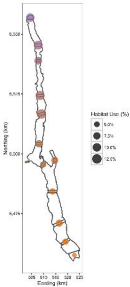

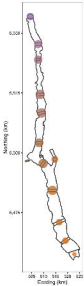

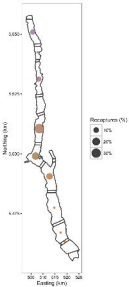

Northing (km)

Receptance (%)

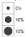

5,650

5,600

5,550

5,500

Eastings (km)

5,650

5,700

5,750

5,800

5,850
